1 **Beyond the ecology of fear: non-lethal effects of predators are strong whereas**  
2 **those of parasites are diverse**

3

4 D.R. Daversa<sup>1,2\*</sup>, R.F. Hechinger<sup>3</sup>, E. Madin<sup>4</sup>, A. Fenton<sup>1</sup>, A.I. Dell<sup>5,6,7</sup> E. Ritchie<sup>8</sup>, J. Rohr<sup>9</sup>,  
5 V.H.W. Rudolf<sup>10\*\*</sup>.

6 <sup>1</sup>Institute of Integrative Biology, University of Liverpool, Liverpool, United Kingdom

7 <sup>2</sup>Institute of Zoology, Zoological Society of London, London, United Kingdom

8 <sup>3</sup>Scripps Institution of Oceanography, University of California, San Diego, United States of America

9 <sup>4</sup>Hawai'i Institute of Marine Biology, University of Hawai'i, Kane'ohe, HI 96744, United States of America

10 <sup>5</sup>Department of Biology, Washington University of St. Louis, St. Louis, MO 63130

11 <sup>6</sup>Dept of Biology, Saint Louis University, Saint Louis, MO 63130

12 <sup>7</sup>National Great Rivers Research and Education Centre (NGRREC), East Alton, IL, 62024, USA

13 <sup>8</sup>School of Life and Environmental Sciences, Centre for Integrative Ecology (Burwood campus), Deakin  
14 University, Geelong, Victoria 3220, Australia

15 <sup>9</sup>Department of Biological Sciences, University of Notre Dame, Notre Dame, IN, USA

16 <sup>10</sup>BioSciences, Rice Univ., Houston, TX, USA

17

18 **Key Words:** Natural enemies, Sub-lethal effects, Trait-mediated effects, Trophic  
19 interactions, Animal behaviour, Community ecology, Food webs, Risk effects,

20

21 **Running Title:** Non-lethal responses to predation and parasitism

22

23

24 **\*Corresponding author:** David Daversa, Institute of Integrative Biology, University of  
25 Liverpool, Liverpool, United Kingdom; [ddaversa@gmail.com](mailto:ddaversa@gmail.com)

26

27 **\*\*note that there is an additional author that will be listed in a later version**

## 28 **Abstract**

29 Individuals can alter their behaviour and other traits to reduce threats from predators  
30 and parasites. However, predators and parasites likely elicit different responses,  
31 which subsequently lead to different non-lethal effects. We created a sequentially  
32 structured framework to examine trait responses to distinct predatory and parasitic  
33 consumers. We predicted that parasites with strong negative effects on host fitness  
34 should act like predators and elicit strong responses before attack. We also predicted  
35 that less damaging parasites and micropredators should elicit diverse responses  
36 across multiple interaction stages, because their hosts and prey remain alive while  
37 being eaten. A meta-analysis indicated that predators do tend to elicit stronger  
38 responses than parasites before attack, whereas parasites generally elicit responses  
39 after attack, albeit weaker than pre-attack responses to predators. Organisms exposed  
40 simultaneously to predator and parasite cues responded similarly when exposed to  
41 predator cues alone, suggesting that individuals prioritize anti-predator responses  
42 over responses to less harmful parasites. Extending these findings requires  
43 addressing knowledge gaps concerning responses to different consumer types, costs of  
44 immune responses, and cumulative effects of repeated responses. Expanding research  
45 beyond the predator vs. parasite dichotomy toward a broader consumer-resource  
46 perspective will facilitate understanding of non-lethal effects in complex, multi-  
47 trophic food webs.

48

49 **Introduction**

50           “Whenever I swim in the ocean... I feel increasingly panicky and ... I must leave  
51 the water” is a typical response to the 1975 film *Jaws* (Cantor 2004). As with  
52 moviegoers, many species respond to predators by changing behaviours, physiology,  
53 or even appearance to avoid being eaten. These non-lethal effects of predators, known  
54 as ‘trait responses’, are pervasive and take many forms, such as seeking shelter (Creel  
55 *et al.* 2005) or maturing faster to reach less vulnerable life stages (Raffel *et al.* 2010).  
56 Such trait responses influence how individuals interact with the broader community,  
57 driving ‘trait-mediated effects’ that range from reduced individual fitness to trophic  
58 cascades (Werner & Peacor 2003; Ritchie & Johnson 2009; Buck & Ripple 2017) that  
59 can destabilize communities (Pringle *et al.* 2019). Wolves, for example, frighten elk  
60 away from exposed foraging grounds into sheltered habitats with less nutritious  
61 vegetation, which then reduces elk birth rates (Creel *et al.* 2007) and alters vegetation  
62 structure (Fortin *et al.* 2005). Predators can therefore impact species and communities  
63 without directly killing prey, just as *Jaws* kept many people from swimming in the  
64 summer of 1975.

65           Perhaps less well recognised is that parasites also elicit trait responses in hosts  
66 with associated non-lethal effects. To reduce infection risk, hosts may avoid infected  
67 conspecifics (Milinski & Bakker 1990; Kavaliers *et al.* 2003a; Behringer *et al.* 2006),

68 defend against infectious propagule attack (Sears *et al.* 2013), or avoid risky areas,  
69 such as faeces representing a hot spot of undetectable nematode eggs (Hart 1994;  
70 Curtis 2014; Weinstein *et al.* 2018). Furthermore, in stark contrast to predation,  
71 parasitism is not immediately lethal, so hosts can also respond *after* successful  
72 parasite attack through various physiological and behavioural responses (Rigby *et al.*  
73 2002; Raberg *et al.* 2009; Buck 2019). For instance, a caterpillar can initiate an  
74 immune response to prevent being killed by a parasitoid wasp (Abram *et al.* 2019).  
75 Basic emotions like “disgust” (Curtis & de Barra 2018; Tybur *et al.* 2018; Weinstein *et*  
76 *al.* 2018) and the age-old cliché “avoid like the plague” suggest that parasite avoidance  
77 is interwoven in our own history as much as is our fear of predators. The diverse trait  
78 responses elicited by parasites has led some to hypothesize that parasites actually  
79 impose stronger cumulative non-lethal effects than predators (Rohr *et al.* 2009; Buck  
80 & Ripple 2017).

81 In this review, we compare trait responses to predation and parasitism,  
82 considering how they may overlap and differ. Although predators and parasites  
83 threaten most species in natural ecosystems, trait responses to predators and  
84 parasites have been largely studied in isolation. As a result, how trait responses to  
85 parasites compare with trait responses to predators is still unclear. We used a general  
86 consumer-resource model to develop hypotheses and predictions for how key life  
87 history differences among predators and parasites, such as the number of attacks they

88 make in a lifetime and whether they kill organisms while eating them, should influence  
89 the likelihood and magnitude of trait responses at different interaction stages. We then  
90 conducted a systematic review and meta-analysis to: (a) assess the literature that  
91 compares trait responses to different forms of predation and parasitism, (b) compare  
92 average response magnitudes between predation and parasitism, and (c) test how  
93 factors related to resources, consumers, and study designs influence trait responses.  
94 We conclude by pointing to several unresolved questions concerning how non-lethal  
95 species interactions affect community and ecosystem dynamics.

96

## 97 **A general trait-response framework for examining non-lethal effects**

### 98 *Theoretical framework*

99       Predators and parasites employ various ‘consumer strategies’, that is, how  
100 individuals find, attack, and consume organisms (Lafferty & Kuris 2002; Lafferty *et al.*  
101 2015). For example, predators have short feeding times (i.e., seconds to days) and eat  
102 multiple organisms in a lifetime, whereas parasites feed on hosts for up to months or  
103 even years, but die or transform after a single feeding interaction. Predators kill prey  
104 before or while consuming them, but mosquitoes and other micropredators do not.  
105 Although some parasites eliminate host fitness, exemplified by parasitoids and  
106 parasitic castrators, others infect hosts without substantial fitness impacts. These and  
107 other differences in consumer strategies likely affect how, and to what extent,

108 organisms respond to them (Buck 2019). To account for these differences when  
109 predicting the non-lethal effects of predation and parasitism, we draw on consumer-  
110 resource theory to develop a general trait-response framework that applies across  
111 both host-parasite and predator-prey systems.

112 We use, as a scaffolding, the general model for consumer-resource population  
113 dynamics developed by Lafferty *et al.* (2015), which collates the key elements of all  
114 consumer-resource models into a single, temporally compartmentalized structure  
115 (Fig. 1, Box 1). Briefly, predators and parasites are ‘consumers’, whereas their prey  
116 and hosts are ‘resources’. Interactions are broken into sequential transitions between  
117 up to three discrete consumer states and up to four corresponding resource states  
118 (circles in Box 1). State transitions — i.e., mortality, contact, attack failure and success,  
119 and feeding (arrows in Box 1) — occur at various rates. Basic differences among  
120 consumer – resource systems are incorporated with a set of binary parameters that  
121 alter model structure (Box 1).

122 We derive three basic trait responses from the model: **avoid contact, counter**  
123 **attack, combat consumption** (Fig. 1)<sup>1</sup>. This temporal sequence implies that trait  
124 responses to minimize consumption can be driven by multiple biological mechanisms.

---

<sup>1</sup> These classifications are similar to “avoidance”, “escape attack”, and “escape capture” defined by Lima & Dill (1990) for behavioural responses of prey to predator encounters, though we propose this alternative terminology as a more comprehensive categorization of the diversity of trait responses elicited by different predators and parasites.

125 In initial interactions with *questing* consumers, *susceptible* resources may **avoid**  
126 **contact** in various ways. Avoidance serves to reduce the rate that *questing* consumers  
127 transition to attacking, with the benefit that *susceptible* resources transition more  
128 slowly to *exposed* states (Table 1). Avoidance responses may manifest as trait  
129 adaptations [i.e. constitutive responses (Westra *et al.* 2015)], such as camouflaged  
130 coloration shown by many species to reduce visibility to predators (e.g. Stevens &  
131 Merilaita 2009), or as induced plastic traits, exemplified by herbivores moving away  
132 from nematode-infected faeces (Hutchings *et al.* 2001; Weinstein *et al.* 2018) or wolf  
133 scents (Creel *et al.* 2005). Resources that become *exposed* to *attacking* consumers may  
134 **counter attack** to increase attack failure (Box 1). Countering attack includes “fight or  
135 flight” responses, like hares sprinting to burrows when being chased by lynx, or  
136 tadpoles jolting their bodies when being attacked by trematode cercariae (Sears *et al.*  
137 2013). Finally, resources—particularly hosts of parasites—that become *ingested* may  
138 **combat consumption**. Combating consumption shortens or slows consumer feeding  
139 rates [i.e. ‘resistance’ in parasitology (Rigby *et al.* 2002)], or lessens the damage of  
140 being eaten [i.e. ‘tolerance’ in parasitology (Raberg *et al.* 2009)]. Responses that  
141 shorten or slow feeding include behaviours like social grooming by primates (Hart &  
142 Hart 2018) and adaptive immune responses to parasitism (Hawley & Altizer 2011).  
143 Increasing tissue repair and protecting high-risk areas of the body from feeding, as  
144 tadpoles do for trematodes (Sears *et al.* 2013), are ways that resources combat

145 consumption by reducing damage without affecting consumer feeding rates. Whether,  
146 and to what degree, resources combat, avoid, or counter, will depend on the different  
147 pressures imposed by different consumers, which are modelled by altering rates of  
148 contact, attack, and/or consumption. Distinguishing these three model-derived  
149 resource trait responses makes it easier to compare, contrast, and make predictions  
150 about the different ways that consumers exert non-lethal effects on resources.

151

#### 152 *Constraints on trait responses*

153 Despite the clear benefits that trait responses provide to resources, various  
154 constraints can limit a resource's ability to avoid, counter, and combat its consumers.  
155 Hence, predicting the timing and magnitude of trait responses also requires  
156 accounting for constraints on resources. Constraints can arise from basic limitations  
157 on detecting consumers and mounting responses, or from trade-offs. First, resources  
158 can mount responses only if they can detect consumer threats. Resources use visual  
159 and non-visual cues to detect predation and parasitism risk, making sensory  
160 limitations - e.g., sight, hearing, and smell – a potential constraint on trait responses.  
161 Second, resources must possess the morphology, physiology, and energy level to  
162 mount specific responses to consumers. For instance, tadpoles cannot physically leave  
163 ponds when predators are present as can adult amphibians, so they may instead  
164 reduce activity levels to avoid consumer contact (Hossie *et al.* 2017). Third, because



165 trait responses can compete with essential activities like feeding, reproducing, or  
166 maintenance (Dröge *et al.* 2017; Hart & Hart 2018), trade-offs can also constrain  
167 resource responses. For example, moose can afford to avoid wolves more in summer  
168 than in winter when food is scarce (Oates *et al.* 2019). These three constraints likely  
169 interact to jointly influence response timing and magnitudes. For example, food  
170 scarcity may interact with moose body size or background nutritional levels to  
171 determine their ability to avoid contact with wolves. Considering these constraints,  
172 along with the potential benefits of response, leads to several hypotheses and  
173 associated predictions for how resources should respond to different consumer  
174 threats.

175

176 *Hypotheses and predictions concerning trait responses against predators and parasites*

177 **Hypothesis 1: Severe fitness consequences of consumption will favour strong**  
178 **trait responses—and strong non-lethal effects—at early interaction stages.**

179 Severe fitness consequences of consumption make combat responses very risky,  
180 placing a premium on mounting defensive responses at earlier interaction stages  
181 when consumers are questing or attacking. This leads to the intuitive prediction that  
182 predators should elicit strong avoidance and counter responses because successful  
183 predation leads to death. Perhaps less intuitively, this hypothesis also leads to the  
184 prediction that parasitoids, which regularly kill their hosts (Lafferty & Kuris 2002;

185 Abram *et al.* 2019), and parasitic castrators, which reproductively kill their hosts, will  
186 be similar to predators in eliciting strong responses at the two early interaction stages.  
187 Other types of parasites with strong negative fitness impacts, such as certain  
188 pathogens, may place similar pressures on hosts by producing detrimental infections.  
189 In contrast, micropredators and less harmful parasites should elicit the weakest  
190 avoidance and counter responses of all consumer types.

191

192 **Hypothesis 2: Resources that remain alive while being eaten can implement and**  
193 **concentrate responses—and incur non-lethal effects—during consumption.**

194 In stark contrast to most prey of predators, hosts are alive while parasites feed, and  
195 prey are alive when micropredators feed. Those resources can therefore mount  
196 combat responses while being ingested. This leads to the prediction that, compared to  
197 predators, many parasites and micropredators will evoke more types of responses  
198 with a more even distribution among the three interaction stages. Because hosts of  
199 castrators and many parasitoids remain alive while being eaten, these predictions  
200 apply for these types of parasites as well. A less obvious prediction is that the ability  
201 to combat consumption may lead to resources concentrating responses in the third  
202 interaction stage for parasites – including parasitoid and parasitic castrators - and  
203 micropredators, particularly in cases where constraints or trade-offs limit avoidance  
204 and combat responses.

205

206 **Hypothesis 3: Detection ability determines trait response timing and magnitude.**

207 Regardless of the fitness consequences of consumption, an inability to detect questing

208 predators and parasites will preclude mounting avoidance responses. Under this

209 hypothesis, the strength of responses should increase with the ease of detecting

210 consumers. For instance, to the extent that visual detection is important to elicit

211 defensive responses, we predict that resources avoid questing predators more than

212 questing micropredators and parasites, because the generally larger size of questing

213 predators relative to questing micropredators and parasites make them easier to see.

214 Exceptions will exist, however; some parasites have large searching stages (e.g., some

215 hymenopteran wasp parasitoids), which would permit easy detection and subsequent

216 avoidance by hosts. Further, certain predators, like some ambush predators and filter

217 feeders, are actually *not* detectable while questing, but only during attack, which

218 precludes avoiding contact but favours countering attack. Hence, this hypothesis does

219 not predict consistent differences among consumer strategies (e.g. predators,

220 parasites, micropredators, etc.), and could perhaps be most strongly tested using

221 predator and parasite species that span a range of detectability.

222         These three hypotheses are not mutually exclusive and can be integrated to

223 predict how trait responses vary among the different types of predation and

224 parasitism in realistic situations (Fig. 1b-d). For instance, foraging mice will avoid

225    questing owls by hiding in burrows (Fig. 1b). Burrow use may vary with flyover  
226    frequency, which predicts mouse-owl contact rates. Burrow use is traded-off against  
227    the cost of reducing mouse feeding, and consequently likely depends on mouse  
228    nourishment. Mice may also detect infective nematode eggs in feeding fields and then  
229    avoid contact by moving to other locations (Fig. 1c). Avoiding contact with nematodes  
230    is likely constrained by mouse ability to detect eggs and should also depend on  
231    movement costs and food availability in new locations. Unlike avoiding owls, the  
232    strength with which mice avoid nematodes may also depend on their ability to combat  
233    infection (consumption by the nematode), perhaps by mounting an immune response.  
234    Effective immune function would favour mice avoiding substantial avoidance costs  
235    (e.g., if mice avoid rich feeding areas with nematodes for poor feeding areas lacking  
236    nematodes), which would concentrate non-lethal effects in consumption stages. All  
237    three responses may also be expected from caterpillar hosts of wasp parasitoids, with  
238    the difference that high risk of death via successful consumption may favour a shift to  
239    earlier avoidance and counter responses (Fig. 1d). What remains unclear is whether  
240    the broader range of responses, and potential concentration of combat responses, to  
241    less virulent parasites like nematodes together might, when combined, rival the  
242    magnitude of the avoidance and counter responses to consumers with severe fitness  
243    consequences. To compare the overall magnitude of trait responses to parasites and

244 predators, we conducted a systematic review of and meta-analysis on available  
245 literature.

246

247 **Systematic review and meta-analysis of trait responses to predation and**  
248 **parasitism**

249 We systematically reviewed studies that measured the magnitude of trait  
250 responses elicited by predators and parasites. We then performed a meta-analysis on  
251 the compiled data to test the predictions established above. Our broad goal with the  
252 meta-analysis was to assess how the type and magnitude of trait responses vary by  
253 consumer strategy as defined by Lafferty and Kuris (2002): solitary predators,  
254 trophically transmitted parasites, typical parasites, and pathogens, parasitoids,  
255 parasitic castrators, micropredators, or social predators. Many studies have measured  
256 trait responses to predators and parasites alone, but we limited our review to studies  
257 that measured comparable responses to both a predator and a parasite for the same  
258 resource species. To focus on trait responses conferring defence, we did not consider  
259 trait changes originating from general parasite pathology, or from parasite adaptive  
260 manipulation of host traits (Poulin *et al.* 1994; Moore 2002; Lafferty & Shaw 2013),  
261 though our framework can accommodate such effects.

262 Detailed information about data collection, extraction and analyses are  
263 available in the Supplementary Material. Briefly, we compiled 129 entries from 15

264 studies, which included 44 predator-prey interactions, 44 host-parasite interactions,  
265 and 41 simultaneous interactions with predators and parasites (Table S1). Although  
266 studies measured several morphological, behavioural, and physiological responses,  
267 behavioural traits were most common, with activity level being the most reported trait  
268 (Fig. S1). No studies fitting our criteria measured physiological or immunological trait  
269 responses. The studies spanned the following consumer strategies: solitary predators,  
270 trophically transmitted parasites, typical parasites, and pathogens (Table S1). We  
271 therefore could not consider responses to parasitoids, parasitic castrators,  
272 micropredators, or social predators. Hereafter, we broadly distinguish between  
273 predators (i.e. solitary predators) and parasites (i.e. trophically-transmitted, typical, or  
274 pathogens). Predator-induced trait responses were only measured during the *questing*  
275 predator state (Fig. S1), whereas measurements of parasite-induced responses  
276 included questing (10), attacking (9), and consuming (25) states (Fig. S1). There were  
277 77 entries for individual-level responses and 49 entries for group-level responses.

278 We calculated the standardized mean difference (Hedge's *d*) (Koricheva *et al.*  
279 2013) from included studies as the measure of trait response magnitudes, whereby  
280 positive effects denoted reductions in trait values (e.g., reduced activity level or mass),  
281 except in measures of space use that measured time in a refuge or distance from a  
282 consumer cue (e.g. positive effect would mean an increase in refuge use). We reversed  
283 the sign of these values so that positive effect sizes would denote reductions in use of

284 risky habitats, indicative of defence (see Table S1 for further details). Because studies  
285 often included a treatment containing both a predator and parasite cue, we also  
286 estimated the magnitude of trait responses to the combined presence of predators and  
287 parasites. We did not have predictions for how these responses would compare to  
288 those made to predators or parasites by themselves. We also considered the following  
289 factors related to consumers, resources, and experimental designs that may have  
290 influenced response magnitudes: a) the type of trait measured to quantify responses  
291 (trait type), b) whether studies used a trait value of individuals or proportions of  
292 individuals in group that exhibited the focal trait (analysis scale); c) whether  
293 responses were elicited under the physical presence of the consumer, or solely by  
294 indirect cues such as used media or ingested conspecifics (consumer presence), d) the  
295 genus and species of the consumer and resource, and e) whether the consumer was in  
296 a questing, attacking or consuming state (Box 1) when the trait response was  
297 measured. We also assessed consumer state and consumer strategy effects using only  
298 the parasite data because data on responses to predators were limited to one  
299 consumer state (questing) and strategy (solitary predator).

300

### 301 *Results*

302 We found considerable variation in response magnitude and direction to  
303 predators (Fig. 2a), parasites (Fig. 2b), and their combination (Fig. 2c). However,

304 although individual parasite-induced effects were sometimes just as strong as  
305 predator-induced effects (Fig. 2), on average and across all stages, predator-based trait  
306 responses were stronger than parasite-based trait responses (Table S2, Fig. 3a). These  
307 patterns were also evident after controlling for consumer state (i.e., questing  
308 predators vs. questing parasites) (Table S2, Fig. 3b). Nevertheless, distinguishing  
309 between parasite states (questing, attacking, or consuming) revealed that parasites, on  
310 average, did elicit responses, but only while they were consuming (i.e. infecting) their  
311 hosts (Table S2, Fig. 3b). The simultaneous presence of predators and parasites also  
312 elicited responses on average, and they were similar in magnitude to trait responses  
313 elicited by predators alone ( $z = 0.10$ ,  $p = 0.476$ ; Fig. 3a). Predators and the  
314 simultaneous presence of predators and parasites elicited reductions in activity but,  
315 on average, did not influence space use or morphological/physiological traits (Table  
316 S2, Fig. 3c). Whether traits were measured at the individual level or group level (e.g.  
317 proportions) influenced response magnitudes, with group-level responses being  
318 stronger (Table S2, Fig. d). Responses were not contingent on the consumers being  
319 physically present; indirect cues of the consumers elicited similar responses (Table  
320 S2). Across the host-parasite interactions studied, responses did not depend on the  
321 specific strategy of parasites (pathogens, trophically transmitted parasites, or typical  
322 parasites; Table S2), and there was insufficient replication to consider how consumer



323 or resource taxon influenced responses. For that reason, these results mostly pertain  
324 to amphibians as resources (Table S1).

325

## 326 **Discussion**

327 We used a general consumer-resource model to construct a framework that can  
328 be broadly applied across many predator-prey and host-parasite systems to predict  
329 trait responses and non-lethal effects. The framework identified plausible  
330 mechanisms driving the timing and magnitude of trait responses, including the fitness  
331 consequences associated with being eaten, whether individuals are alive while being  
332 eaten, and the ease of detecting consumers. From these hypothesized mechanisms, we  
333 generated testable predictions regarding how trait responses should differ between  
334 predator-prey and host-parasite interactions. We generally predict severe fitness  
335 consequences of predator consumption to drive strong avoidance and counter  
336 responses in prey before any contact is made. We also predict that, in general, host  
337 responses to parasites are weaker than those of prey, but also more diverse; a range of  
338 behavioural, morphological, and physiological responses can be made throughout all  
339 interaction stages (Rigby *et al.* 2002; Raberg *et al.* 2009), and potentially concentrated  
340 to combat consumption. These general predictions were supported by our meta-  
341 analysis on the existing literature to directly compare trait responses to predatory  
342 versus parasitic consumers. However, the meta-analysis data predominantly related

343 to a rather narrow taxonomic range of predators and parasites, and several limitations  
344 of the included studies (Box 2) suggest ways forward to corroborate and expand the  
345 results.

346 Several overlooked distinctions in how organisms respond to parasites likely led  
347 to underestimation of overall response magnitudes to parasitism in our meta-analysis.  
348 None of the included studies measured individual responses in more than one  
349 interaction stage, even though parasites commonly evoke responses in all interaction  
350 stages. Longitudinal data on individual responses to multiple consumer states will  
351 more comprehensively quantify trait response magnitudes, and may even reveal  
352 interactive effects between trait responses (Boxes 2,3). Given that immunological  
353 responses may be the most common type of host response to parasitism, non-lethal  
354 effects arising from host combat responses, in particular, are likely to be much  
355 stronger than our meta-analysis suggests. Additionally, non-lethal effects of parasitism  
356 can also arise from host phenotypic changes caused by parasite manipulation (Poulin  
357 *et al.* 1994; Lafferty & Shaw 2013), and even directly from parasite feeding  
358 independent of defensive responses. For instance, general energy drain (Munger &  
359 Karasov 1989; Delahay *et al.* 1995) or direct tissue damage caused by parasite  
360 infection can substantially impact host performance (Palstra *et al.* 2007). Such  
361 pathological effects are not driven by a host response, but nevertheless represent non-  
362 lethal effects. These distinct types of non-lethal effects of parasitism could collectively

363 rival in magnitude the stronger predator avoidance that we observed. To test this  
364 hypothesis would require longitudinal data on predator responses as well, which our  
365 review indicates is also lacking in the literature. Although we expect combat  
366 responses to predation to be rare, there are exceptional cases of prey defending  
367 themselves while being ingested, particularly for some slow predators that do not kill  
368 their prey before consuming them (e.g., sea stars eating mussels). In such cases,  
369 predators could also evoke combat responses.

370       Considering distinct predator and parasite consumer strategies led to more  
371 comprehensive trait response predictions that did not completely align with the  
372 predator versus parasite dichotomy. However, our systematic review revealed a  
373 paucity of literature to develop this more holistic approach at understanding trait  
374 responses, suggesting a fruitful area of future research on non-lethal effects. For  
375 example, we predict parasitoids and parasitic castrators should act like predators to  
376 elicit strong pre-contact responses, but share with other parasites the ability to elicit  
377 combat responses during consumption. Micropredators, by not killing their prey when  
378 feeding, should act like parasites to elicit responses across all interaction stages.  
379 Studies that focus solely on micropredators (Kavaliers *et al.* 2003b, 2005) and  
380 parasitoids (Abram *et al.* 2019), do find that resources avoid, counter, and combat  
381 these consumers, though we still lack direct comparisons of the magnitudes of these  
382 responses with similar responses to predators and typical parasites. Furthermore

383 there remains much to be known regarding the extent to which detectability  
384 constrains or enables responses. Testing these more specific, yet meaningful, trait  
385 response predictions requires distinguishing not just between predators and  
386 parasites, but also different types of predators and parasites. A synthesis of trait  
387 responses from multiple single-consumer studies may permit tests of these  
388 predictions, but will come with the potential expense of error from inconsistent study  
389 designs. To minimize such error, we encourage experiments that directly compare  
390 trait responses to a broader range of consumer strategies and resource species.

391       Regardless of how individual resources respond to predators and parasites  
392 alone, risks of predation and parasitism in the wild rarely occur in isolation. The non-  
393 additive predator and parasite effects that we observed in the meta-analysis may be  
394 indicative of priority effects, whereby the first type of exposure elicits the stronger  
395 response, though we could not test for this. Additionally, predators may frequently  
396 interfere with parasite responses by imposing stronger immediate threats to survival.  
397 Trade-offs between defences against predation and parasitism, such as adjustments in  
398 activity by tadpoles (Koprivnikar & Urichuk 2017) and shoaling behaviour by guppies  
399 (Stephenson *et al.* 2015), could also explain why it might be difficult to respond  
400 effectively to different simultaneous threats. However, although trade-offs between  
401 predator and parasite defences have been considered previously (Orlowski *et al.* 2012;  
402 Stephenson *et al.* 2015; Koprivnikar & Urichuk 2017), our meta-analysis highlights

403 that anti-predator and anti-parasite responses may also be complementary in that  
404 predators and parasites can elicit similar responses, and most of the significant  
405 predator and parasite responses reported by studies were in the same direction (i.e. a  
406 reduction in the trait expression). A well-demonstrated example comes from tadpoles  
407 (Box 3), which reduce activity levels (Marino *et al.* 2014; Preston *et al.* 2014; Gallagher  
408 *et al.* 2019), increase refuge use (Han *et al.* 2011) and reduce time in foraging habitats  
409 (Koprivnikar & Penalva 2015) when either exposed to predators or infected with  
410 parasites. When responses deter both predators and parasites, avoiding predation  
411 may also inadvertently aid in the avoidance of parasites.

412

### 413 **Conclusion**

414 Whether through fear or through infection, consumers elicit costly trait  
415 responses in their resources that give rise to non-lethal effects at the level of  
416 individuals, communities, and ecosystems. A general consumer-resource model  
417 helped to develop a framework to predict trait responses to various consumer types.  
418 Owing to differences in consumer strategies that influence when and how strongly  
419 they impact resources, we expect different trait responses to different types of  
420 predators and parasites, and therefore, different non-lethal effects. However, many  
421 consumer strategies have not yet been tested in a comparative fashion. Expanding  
422 research of non-lethal interactions beyond the predator vs. parasite dichotomy toward

423 a broader consumer-resource perspective sets the foundation for exploring how non-  
424 lethal effects manifest in the complex, multi-trophic food webs found in real  
425 ecosystems.

426

## 427 **Acknowledgements**

428 We thank Gordon Research Conferences and Andy Sih, chair of the 2016 meeting  
429 “Predator-Prey Interactions”, for providing the forum that inspired this work; the  
430 EGLIDE group (Amy Pedersen, Amy Sweeny, Saudamini Venkatesan, Dishon Muloi,  
431 Alexandra Morris, Shaun Keegan and Kayleigh Gallagher), the EEGID group at  
432 University of Liverpool (Mike Begon, Greg Hurst, David Montagnes, Mark Viney, Steve  
433 Parratt), the Garner lab at the Zoological Society of London (Trent Garner, Chris Owen,  
434 Stephen Price, Goncalo Rosa, Bryony Allan), and Chris Carbone for their comments on  
435 earlier versions of the review; and Daniel Noble, Raj Whitlock, and Wolfgang  
436 Viechtbauer for advice on the meta-analysis. We also thank an unlisted author for  
437 their contributions to the idea formation and manuscript writing. This author will be  
438 named in future versions of the manuscript. Any use of trade, product, or firm names  
439 in this publication is for descriptive purposes only and does not imply endorsement by  
440 the U.S. Government. This manuscript benefited from NSF Ecology of Infectious  
441 Diseases grant (OCE-1115965) and a grant from the Natural Environment Research  
442 Council UK (NE/N009800/1).

443 **References**

- 444 Abram, P.K., Brodeur, J., Urbaneja, A. & Tena, A. (2019). Nonreproductive effects of  
445 insect parasitoids on their hosts. *Annu. Rev. Entomol.*, 64, 259–276.
- 446 Behringer, D.C., Butler, M.J. & Shields, J.D. (2006). Avoidance of disease by social  
447 lobsters. *Nature*, 441, 421–421.
- 448 Buck, J.C. (2019). Indirect effects explain the role of parasites in ecosystems. *Trends in*  
449 *Parasitology*.
- 450 Buck, J.C. & Ripple, W.J. (2017). Infectious agents trigger trophic cascades. *Trends in*  
451 *Ecology & Evolution*, 32, 681–694.
- 452 Cantor, J. (2004). “I’ll Never Have a Clown in My House” -- Why movie horror lives on.  
453 *Poetics Today*, 25, 283–304.
- 454 Creel, S., Christianson, D., Liley, S. & Winnie, J.A. (2007). Predation risk affects  
455 reproductive physiology and demography of Elk. *Science*, 315, 960–960.
- 456 Creel, S., Winnie, J., Maxwell, B., Hamlin, K. & Creel, M. (2005). Elk alter habitat  
457 selection as an antipredator response to wolves. *Ecology*, 86, 3387–3397.
- 458 Curtis, V. & de Barra, M. (2018). The structure and function of pathogen disgust.  
459 *Philosophical Transactions of the Royal Society B: Biological Sciences*, 373,  
460 20170208.
- 461 Curtis, V.A. (2014). Infection-avoidance behaviour in humans and other animals.  
462 *Trends in Immunology*, 35, 457–464.

- 463 Daversa, D.R., Manica, A., Bosch, J., Jolles, J.W. & Garner, T.W.J. (2018). Routine habitat  
464 switching alters the likelihood and persistence of infection with a pathogenic  
465 parasite. *Functional Ecology*, 32, 1262–1270.
- 466 Delahay, R.J., Speakman, J.R. & Moss, R. (1995). The energetic consequences of  
467 parasitism: effects of a developing infection of *Trichostrongylus tenuis*  
468 (Nematoda) on red grouse (*Lagopus lagopus scoticus*) energy balance, body  
469 weight and condition. *Parasitology*, 110, 473.
- 470 Dröge, E., Creel, S., Becker, M.S. & M'soka, J. (2017). Risky times and risky places  
471 interact to affect prey behaviour. *Nature Ecology & Evolution*, 1, 1123–1128.
- 472 Fortin, D., Beyer, H.L., Boyce, M.S., Smith, D.W., Duchesne, T. & Mao, J.S. (2005). Wolves  
473 influence elk movements: behavior shapes a trophic cascade in Yellowstone  
474 National Park. *Ecology*, 86, 1320–1330.
- 475 Gallagher, S.J., Tornabene, B.J., DeBlieux, T.S., Pochini, K.M., Chislock, M.F., Compton,  
476 Z.A., *et al.* (2019). Healthy but smaller herds: Predators reduce pathogen  
477 transmission in an amphibian assemblage. *J Anim Ecol*, 1365-2656.13042.
- 478 Han, B.A., Searle, C.L. & Blaustein, A.R. (2011). Effects of an infectious fungus,  
479 *Batrachochytrium dendrobatidis*, on amphibian predator-prey interactions.  
480 *PLoS ONE*, 6, e16675.
- 481 Hart, B.L. (1994). Behavioural defense against parasites: interaction with parasite  
482 invasiveness. *Parasitology*, 109, S139–S151.



- 483 Hart, B.L. & Hart, L.A. (2018). How mammals stay healthy in nature: the evolution of  
484 behaviours to avoid parasites and pathogens. *Philosophical Transactions of the*  
485 *Royal Society B: Biological Sciences*, 373, 20170205.
- 486 Hawley, D.M. & Altizer, S.M. (2011). Disease ecology meets ecological immunology:  
487 understanding the links between organismal immunity and infection dynamics  
488 in natural populations: Disease ecology meets ecological immunology.  
489 *Functional Ecology*, 25, 48–60.
- 490 Hossie, T., Landolt, K. & Murray, D.L. (2017). Determinants and co-expression of anti-  
491 predator responses in amphibian tadpoles: a meta-analysis. *Oikos*, 126.
- 492 Hutchings, M.R., Gordon, I.J., Kyriazakis, I. & Jackson, F. (2001). Sheep avoidance of  
493 faeces-contaminated patches leads to a trade-off between intake rate of forage  
494 and parasitism in subsequent foraging decisions. *Animal Behaviour*, 62, 955–  
495 964.
- 496 Kavaliers, M., Colwell, D.D., Braun, W.J. & Choleris, E. (2003a). Brief exposure to the  
497 odour of a parasitized male alters the subsequent mate odour responses of  
498 female mice. *Animal Behaviour*, 65, 59–68.
- 499 Kavaliers, M., Colwell, D.D. & Choleris, E. (2003b). Learning to fear and cope with a  
500 natural stressor: individually and socially acquired corticosterone and  
501 avoidance responses to biting flies. *Hormones and Behavior*, 43, 99–107.

- 502 Kavaliers, M., Colwell, D.D. & Choleris, E. (2005). Kinship, familiarity and social status  
503 modulate social learning about ?micropredators? (biting flies) in deer mice.  
504 *Behavioral Ecology and Sociobiology*, 58, 60–71.
- 505 Koprivnikar, J. & Penalva, L. (2015). Lesser of two evils? foraging choices in response  
506 to threats of predation and parasitism. *PLOS ONE*, 10, e0116569.
- 507 Koprivnikar, J. & Urichuk, T.M.Y. (2017). Time-lagged effect of predators on tadpole  
508 behaviour and parasite infection. *Biology Letters*, 13, 20170440.
- 509 Koricheva, J., Gurevitch, J. & Mengersen, K. (2013). *Handbook of Meta-analysis in*  
510 *Ecology and Evolution*. Princeton University Press.
- 511 Lafferty, K.D., DeLeo, G., Briggs, C.J., Dobson, A.P., Gross, T. & Kuris, A.M. (2015). A  
512 general consumer-resource population model. *Science*, 349, 854–857.
- 513 Lafferty, K.D. & Kuris, A.M. (2002). Trophic strategies, animal diversity and body size.  
514 *Trends in Ecology & Evolution*, 17, 507–513.
- 515 Lafferty, K.D. & Shaw, J.C. (2013). Comparing mechanisms of host manipulation across  
516 host and parasite taxa. *Journal of Experimental Biology*, 216, 56–66.
- 517 Lima, S.L. & Dill, L.M. (1990). Behavioral decisions made under the risk of predation: a  
518 review and prospectus. *Canadian Journal of Zoology*, 68, 619–640.
- 519 Marino, J.A., Holland, M.P. & Middlemis Maher, J. (2014). Predators and trematode  
520 parasites jointly affect larval anuran functional traits and corticosterone levels.  
521 *Oikos*, 123, 451–460.

- 522 Milinski, M. & Bakker, T.C.M. (1990). Female sticklebacks use male coloration in mate  
523 choice and hence avoid parasitized males. *Nature*, 344, 330.
- 524 Moore, J. (2002). *Parasites and the Behavior of Animals*. Oxford University Press.
- 525 Munger, J.C. & Karasov, W.H. (1989). Sublethal parasites and host energy budgets:  
526 tapeworm infection in white-footed mice. *Ecology*, 70, 904–921.
- 527 Oates, B.A., Merkle, J.A., Kauffman, M.J., Dewey, S.R., Jimenez, M.D., Vartanian, J.M., *et al.*  
528 (2019). Antipredator response diminishes during periods of resource deficit for  
529 a large herbivore. *Ecology*, 100, e02618.
- 530 Orlofske, S.A., Jadin, R.C., Preston, D.L. & Johnson, P.T. (2012). Parasite transmission in  
531 complex communities: predators and alternative hosts alter pathogenic  
532 infections in amphibians. *Ecology*, 93, 1247–1253.
- 533 Palstra, A.P., Heppener, D.F.M., van Ginneken, V.J.T., Székely, C. & van den Thillart,  
534 G.E.E.J.M. (2007). Swimming performance of silver eels is severely impaired by  
535 the swim-bladder parasite *Anguillicola crassus*. *Journal of Experimental Marine*  
536 *Biology and Ecology*, 352, 244–256.
- 537 Poulin, R., Brodeur, J. & Moore, J. (1994). Parasite manipulation of host behaviour:  
538 Should hosts always lose? *Oikos*, 479–484.
- 539 Preston, D.L., Boland, C.E., Hoverman, J.T. & Johnson, P.T.J. (2014). Natural enemy  
540 ecology: comparing the effects of predation risk, infection risk and disease on  
541 host behaviour. *Functional Ecology*, 28, 1472–1481.

- 542 Pringle, R.M., Kartzinel, T.R., Palmer, T.M., Thurman, T.J., Fox-Dobbs, K., Xu, C.C.Y., *et al.*  
543 (2019). Predator-induced collapse of niche structure and species coexistence.  
544 *Nature*, 570, 58–64.
- 545 Raberg, L., Graham, A.L. & Read, A.F. (2009). Decomposing health: tolerance and  
546 resistance to parasites in animals. *Philosophical Transactions of the Royal*  
547 *Society B: Biological Sciences*, 364, 37–49.
- 548 Raffel, T.R., Hoverman, J.T., Halstead, N.T., Michel, P.J. & Rohr, J.R. (2010). Parasitism in  
549 a community context: trait-mediated interactions with competition and  
550 predation. *Ecology*, 91, 1900–1907.
- 551 Relyea, R.A. & Werner, E.E. (1999). Quantifying the relation between predator-induced  
552 behavior and growth performance in larval anurans. *Ecology*, 80, 2117.
- 553 Rigby, M.C., Hechinger, R.F. & Stevens, L. (2002). Why should parasite resistance be  
554 costly? *Trends in parasitology*, 18, 116–120.
- 555 Ritchie, E.G. & Johnson, C.N. (2009). Predator interactions, mesopredator release and  
556 biodiversity conservation. *Ecology Letters*, 12, 982–998.
- 557 Rohr, J.R., Swan, A., Raffel, T.R. & Hudson, P.J. (2009). Parasites, info-disruption, and  
558 the ecology of fear. *Oecologia*, 159, 447–454.
- 559 Sears, B.F., Snyder, P.W. & Rohr, J.R. (2013). Infection deflection: hosts control parasite  
560 location with behaviour to improve tolerance. *Proceedings of the Royal Society*  
561 *B: Biological Sciences*, 280, 20130759–20130759.

- 562 Stephenson, J.F., Van Oosterhout, C., Mohammed, R.S. & Cable, J. (2015). Parasites of  
563 Trinidadian guppies: evidence for sex-and age-specific trait-mediated indirect  
564 effects of predators. *Ecology*, 96, 489–498.
- 565 Stevens, M. & Merilaita, S. (2009). Animal camouflage: current issues and new  
566 perspectives. *Philosophical Transactions of the Royal Society B: Biological*  
567 *Sciences*, 364, 423–427.
- 568 Tybur, J.M., Çınar, Ç., Karinen, A.K. & Perone, P. (2018). Why do people vary in disgust?  
569 *Philosophical Transactions of the Royal Society B: Biological Sciences*, 373,  
570 20170204.
- 571 Van Buskirk, J. (2001). Specific induced responses to different predator species in  
572 anuran larvae. *Journal of Evolutionary Biology*, 14, 482–489.
- 573 Weinstein, S.B., Buck, J.C. & Young, H.S. (2018). A landscape of disgust. *Science*, 359,  
574 1213–1214.
- 575 Werner, E.E. & Peacor, S.D. (2003). A review of trait-mediated indirect interactions in  
576 ecological communities. *Ecology*, 84, 1083–1100.
- 577 Westra, E.R., van Houte, S., Oyesiku-Blakemore, S., Makin, B., Broniewski, J.M., Best, A.,  
578 *et al.* (2015). Parasite Exposure Drives Selective Evolution of Constitutive  
579 versus Inducible Defense. *Current Biology*, 25, 1043–1049.
- 580

**(a) general trait response framework for consumer-resource interactions**

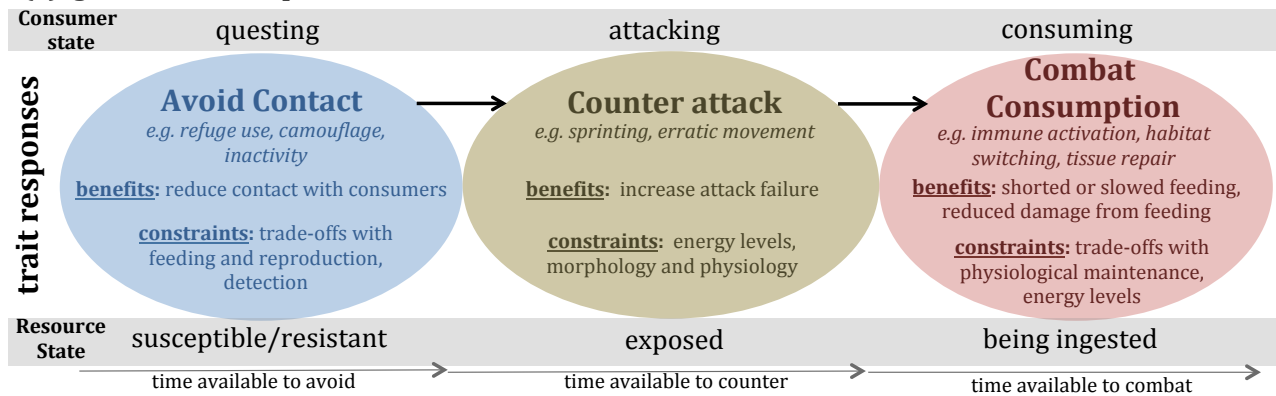

**(b) responses to predators**

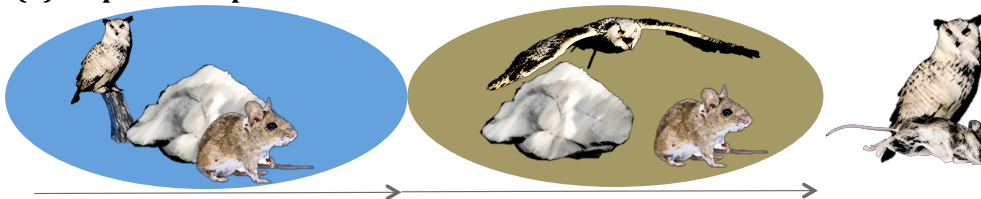

**(c) responses to parasites and micropredators**

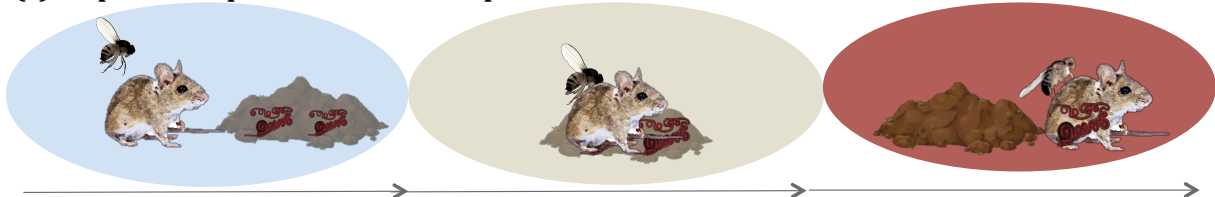

**(d) responses to parasitoids**

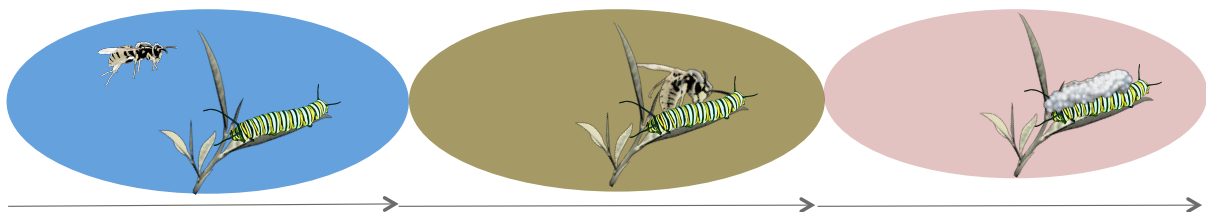

581

582 **Fig. 1. A general trait response framework and predictions (a)** Resources can

583 respond to consumers to reduce contact rates, attack rates, and feeding rates, but

584 might be constrained by physical and sensory limitations, as well as trade-offs against

585 other fitness-related activities (e.g. feeding and reproducing). The general framework

586 can be tailored to specific types of consumer-resource interactions, such as

587 interactions between field mice and **(b)** owl predators, **(c)** biting flies and infective

588 nematodes (red worms in faeces), or **(d)** between caterpillars and parasitoid wasps.

589 The opacity of the circles denotes the predicted strength of responses. The lack of a

590 combat stage in **(b)** illustrates that resources rarely repond during consumption by

591 predators.

592

593

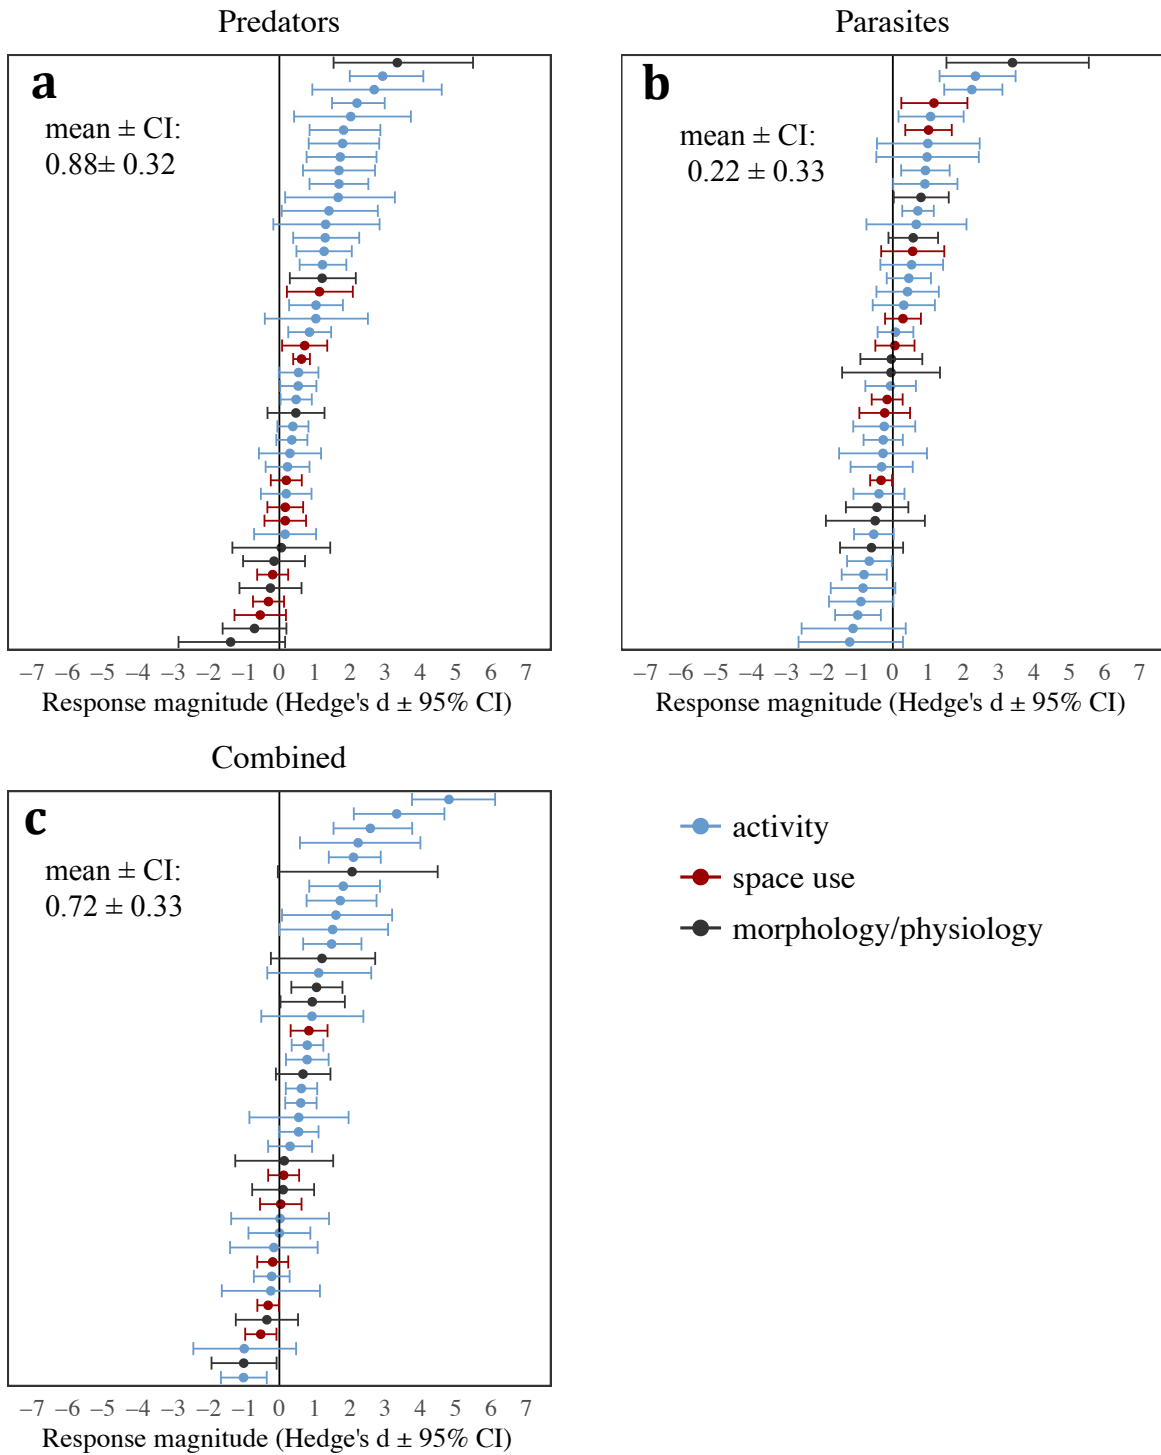

594

595 **Fig. 2. Forest plots of studies used in the meta-analysis.** The distribution of effect

596 sizes for responses elicited by the presence of **(a)** predators, **(b)** parasites, and **(c)**

597 their combined presence resulting from resource adjustments in behavioural (grey)



598 and morphological/physiological traits (blue). Error bars denote the 95% confidence

599 intervals.

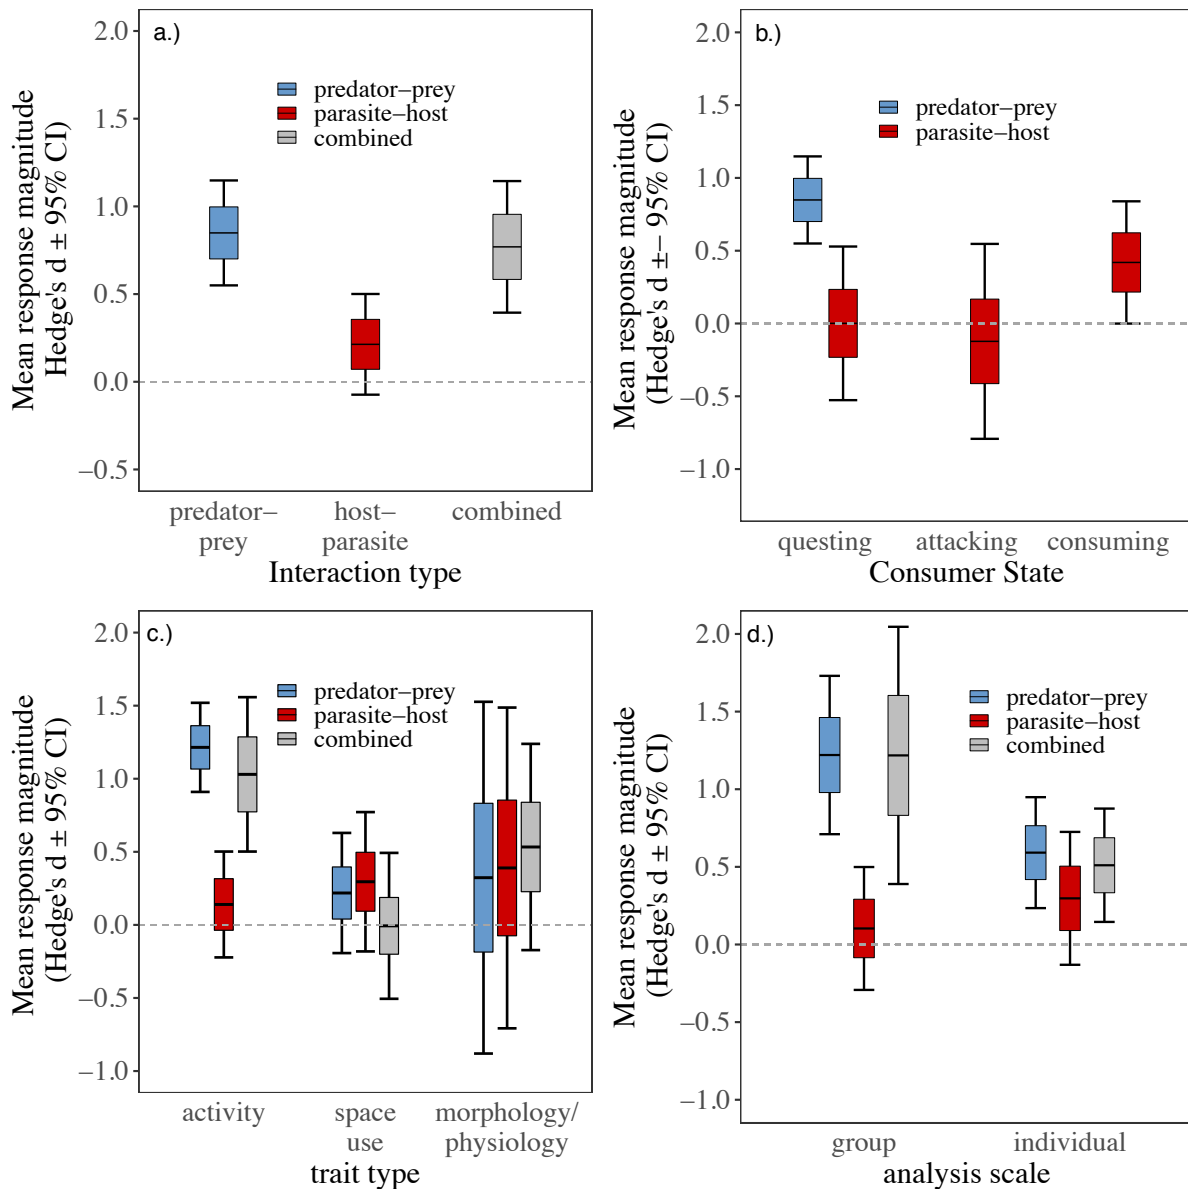

600

601 **Fig. 3. Relative magnitude of responses to predation vs. parasitism. (a)** The

602 estimated mean magnitude of trait responses to predation cues (blue), parasitism cues

603 (red), and both cues (grey). **(b)** Mean trait responses to predators (blue) and parasites

604 (red) during each consumer state comprising the interaction. Only pre-attack

605 responses to questing predators were found in our literature review, likely owing the

606 low probability of surviving attack or consumption by predators. Responses to the

607 combined presence of predators and parasites are not shown because only one study

608 with this treatment had predators and parasites in the same state. **(c, d)** Estimated  
609 mean trait response magnitudes to predation cues (blue), parasitism cues (red), and  
610 both cues (grey), broken down by **(c)** the type of trait measured and **(d)** the scale at  
611 which trait responses measured. Lines denote the mean response magnitudes, boxes  
612 denote the standard error of the mean, and error bars denote the 95% confidence  
613 intervals.

| Resource Response  | Resource transition | Consumer transition | processes affected                          | Examples                                                                              | Consumer Type           | Potential costs to resource                                                | Costs to consumer   |
|--------------------|---------------------|---------------------|---------------------------------------------|---------------------------------------------------------------------------------------|-------------------------|----------------------------------------------------------------------------|---------------------|
| Avoid Contact      | ↑S-R                | ↓Q-A                | Contact                                     | burrow use when predators are present; vaccination from parasitic infection           | All                     | reduced food intake and reproduction                                       | Hunger              |
|                    | ↓S-E                | ↓Q-A                | Contact                                     | camouflaged morphology of prey, leaving habitats with cues of parasite infestation    | All                     | reduced food intake and reproduction                                       | energy loss, hunger |
| Counter attack     | ↑E-S                | ↑A-Q                | Attack failure<br>Resource Recovery to S    | Fleeing from approaching predators                                                    | Predator, micropredator | energy loss or allocation trade-offs                                       | energy loss, hunger |
|                    | ↑E-S                | ↑A death            | Consumer death<br>Resource recovery to S    | Deflecting parasitic propagules or micropredators; venomous biting of predators       | All                     | energy loss or allocation trade-offs                                       | Death               |
|                    | ↑E-R                | ↑A-Q                | Attack failure<br>Resource recovery to S    | fleeing approaching predators via dispersal to areas outside of consumer distribution | Predator                | energy loss or allocation trade-offs                                       | Energy loss, hunger |
|                    | ↑E-R                | ↑A death            | Consumer death<br>Resource recovery to S    | Developing antibodies after deflecting parasitic propagules                           | All                     | energy loss or allocation trade-offs                                       | Death, hunger       |
|                    | ↑I-S                | ↑C-Q                | Consumption ended<br>Resource recovery to S | swatting, jolted body movement, poisonous flesh                                       | Micropredator           | energy loss or allocation trade-offs                                       | Failure,            |
|                    | ↑I-S                | ↑C death            | Consumer Death<br>Resource recovery to S    | Grooming, immune activation, habitat switching                                        | Micropredator, parasite | energy loss or allocation trade-offs, reduced food intake and reproduction | Death               |
| Combat consumption | ↑I-R                | ↑C-Q                | Consumption ended<br>Resource recovery to S | dispersal to areas outside of consumer distribution                                   | Micropredator           | energy loss or allocation trade-offs                                       | Failure, hunger     |
|                    | ↑I-R                | ↑C death            | consumer death<br>Resource recovery to S    | Sterile immunity                                                                      | Pathogens               | energy loss or allocation trade-offs                                       | Death, hunger       |

615 **Table 1. Trait responses and their consequences for consumer-resource**  
616 **dynamics.** The three types of trait responses that predators and parasites may elicit  
617 (Column 1) have distinct effects on interaction dynamics (columns 2-3), in part  
618 because each response affects specific biological processes (Column 3). For columns 2  
619 and 3: S = susceptible, E = exposed, I = ingested, R = resistant, Q = questing, A =  
620 attacking, C = consuming, as per Lafferty et al. 2015. Arrows denote when responses  
621 increase transition rates and down arrows denote when trait responses decrease  
622 transition rates.

623

624

625

626

627

628

629

630

631 **Box 1. Overview of the general consumer resource model.**

632 The Lafferty *et al.* (2015) model helps identify and compare different consumer-  
633 resource interactions using a singular and formalized mathematical logic. During  
634 interactions the consumer can be in one of three states: “questing”, “attacking”, or  
635 “consuming”. The resource, here being a prey or host, moves through a corresponding  
636 four states; they are “exposed” when under attack, being “ingested” while consumers  
637 are consuming them, and can either be “susceptible” or “resistant” to new attack. State  
638 transitions are driven by multiple biological processes, which can be represented by  
639 simple per capita rates or complex functions. Consumers and resources transition  
640 from questing and susceptible states, respectively, according to detection rates of each  
641 organism and attack rates of the consumer, while they transition to consuming and  
642 ingested states, respectively, according to attack success rates of the consumer (Fig.  
643 1a). Handling rates determine transitions back to questing and susceptible states or  
644 alternatively, death rates of consumers and resources following consumption. All  
645 states have death rates that allow for specific costs to be specified. The expanded  
646 model shown here can be formally simplified (through setting some rates to zero to  
647 subsume states) to represent nearly all classic consumer-resource models.

648 The expanded model does not represent a specific consumer-resource interaction.  
649 Instead, a set of binary parameters (switches) makes it easy to specify distinct  
650 consumer strategies. For instance, the “fatal attack” parameter ( $f$ ) defines whether

651 resources are dead ( $f = 1$ ) or alive ( $f = 0$ ) after consumption, which distinguishes  
652 predators and parasitoids from other parasites and micropredators. The “joint death”  
653 parameter defines whether the consumer dies if its resource dies ( $j = 1$ ) or remains  
654 living ( $j = 0$ ), which distinguishes all parasites (which have an intimate relationship  
655 with their host) from predators and micropredators. Finally, the “multiple attacks”  
656 parameter defines whether the consumer attacks once in a lifetime ( $m = 0$ ), as  
657 parasites and parasitoids do, or more than once in a lifetime ( $m = 1$ ), as  
658 micropredators and predators do.

659

660

661

662

663

664 **Box 2. Future directions for research on non-lethal effects**

665 There remain several limitations in the comparative data on trait responses to, and  
666 non-lethal effects of, predators and parasites. Addressing the following limitations will  
667 lead to more comprehensive estimates of non-lethal effects in diverse, real  
668 ecosystems:

669 **1. Comparative experiments of trait responses that cover a broader range of**  
670 **consumer-resource systems** can determine how generalizable patterns are across  
671 systems, and opens avenues to consider factors, like phylogenetics of consumer and  
672 resource, on response magnitudes. Most comparative trait response studies identified  
673 by our systematic review used larval amphibians and their aquatic consumers. The  
674 experimental designs of those studies provide examples of how comparisons of trait  
675 responses to different types of consumers can be performed with other species to test  
676 the generality of our meta-analysis results.



677 **2. Comparative studies that include responses to parasitic castrators,**  
678 **parasitoids and micropredators** are needed to provide novel tests of the  
679 mechanisms, such as detection and fitness consequences, underlying trait responses to  
680 consumer threats (see Discussion). Comparisons of trait responses to different  
681 consumer types are currently limited to typical and trophically-transmitted parasites,  
682 pathogens, and solitary predators – only three of the 10 consumer life histories found  
683 in natural ecosystems (Lafferty & Kuris 2002; Lafferty *et al.* 2015).

684 **3. Considering the full array of parasite non-lethal effects on hosts** will be  
685 important to truly compare predators and parasites. For instance, though immune  
686 responses are one of the most common forms of anti-parasite defence, we were not  
687 able to include immune responses into comparisons of trait responses to predators  
688 and parasites. Because immune responses can be costly to initiate and maintain, such  
689 host responses certainly cause non-lethal effects. Further, parasites may alter host  
690 traits in ways that do not involve defensive responses, including by pathological  
691 energy drain or tissue damage, or via adaptive host manipulation of host phenotypes.  
692 All these effects occur during the consumption phase and will be uniquely pronounced  
693 for parasites compared to predators.

694 **4. Longitudinal data on prey and host responses** are needed to consider how  
695 multiple responses elicited by single consumers collectively shape the magnitude of  
696 non-lethal effects. Longitudinal data may even reveal interactive effects between trait

697 responses, such that mounting one type of response affects the strength of other  
698 responses. For example, parasites whose infections are not highly costly (e.g., many  
699 gastrointestinal helminths) may cause hosts to prioritize combat responses to  
700 minimize trade-offs of avoiding contact against fitness-related activities, like feeding  
701 and reproducing (Moore 2002; Hart & Hart 2018). This occurrence may explain why  
702 newts, for example, do not avoid infective questing parasites in breeding ponds, but  
703 infections from those parasites drive the same individuals to leave those ponds  
704 (Daversa *et al.* 2018). Prioritization of combat responses to parasitism provides one  
705 explanation for our finding that average responses to parasites were strongest after  
706 parasites commenced feeding.

707

708 **5. Linking trait-response magnitudes to trait-mediated effects** can provide  
709 estimates of how the non-lethal impacts of consumers on individual traits correspond  
710 with their broader impacts on individual fitness, and community and ecosystem  
711 dynamics. Future work can extend the length of prey and host monitoring to link trait  
712 responses to individual fitness. Mesocosm and field experiments mirroring the  
713 experimental designs of the studies in our meta-analysis can introduce primary  
714 producers and other species in food webs into the picture, allowing associations  
715 between response magnitudes to predators and parasites and trophic flows and  
716 cascades to be quantified.

717 **Box 3. Larval anurans as a case study for interactive non-lethal effects of**  
718 **predation and parasitism.**

719 The literature on trait responses to consumers is mostly about frogs. Larval anurans  
720 (i.e. tadpoles) were the most studied resource species in our meta-analysis (Table S1),  
721 and how tadpole behaviour responds to predation risk (Relyea & Werner 1999; Van  
722 Buskirk 2001; Hossie *et al.* 2017) and parasitism (Han *et al.* 2011; Preston *et al.* 2014;  
723 Gallagher *et al.* 2019) is well-documented for several species. Questing dragonfly  
724 larvae cause tadpoles to reduce activity levels in order to avoid contact, a trait  
725 response that can reduce rates at which tadpoles are eaten. Similarly, parasitic  
726 trematodes can affect tadpole activity, but tadpole responses seem more variable and  
727 depend on the parasite state; *questing* trematode cercariae either elicit no change in  
728 activity (Preston *et al.* 2014) or increase activity (Rohr *et al.* 2009; Raffel *et al.* 2010),  
729 whereas *attacking* cercariae cause strong activity spikes in tadpoles that increase  
730 attack failure rates (Sears *et al.* 2013). However, *consuming* trematode states (larval  
731 metacercarial stages in tissues) cause tadpoles to reduce activity (Preston *et al.* 2014).

732 The rich literature using this exemplar system offers guidelines for how studies  
733 could be designed to quantify non-lethal effects of predators and parasites in other  
734 systems. In general, simultaneous interactions with both predators and parasites elicit  
735 reductions in activity similar to encounters with predators alone (Fig. 1a). Although  
736 this finding suggests that tadpoles prioritize predator avoidance over parasite

737 avoidance, trait responses elicited during these multi-trophic interactions may be  
738 more complex. For example, because trematode-induced changes in tadpole activity  
739 vary by parasite state, trait responses and their non-lethal effects may vary depending  
740 on the order of encounters, otherwise known as priority effects. Being exposed to  
741 attacking trematode cercariae during or after encounters with predatory insects poses  
742 a clear trade-off between increasing activity to counter cercariae attack and  
743 decreasing activity to avoid contact with the predator. Under the hypothesis that  
744 severe fitness consequences of consumption will favour strong trait responses  
745 (Hypothesis 1 in main text), the tadpoles should sustain reduced activity levels, giving  
746 rise to non-lethal effects in the form of increased infection rates and reduced feeding  
747 rates (Fig S4a). By contrast, being exposed to attacking cercariae before encounters  
748 with predatory insects should first elicit activity increases, followed by reduced  
749 activity in individuals that become infected. If a questing predator is then encountered,  
750 infections should facilitate contact avoidance of the predator (Fig. S4b). Nevertheless,  
751 the possibility exists that encounters with questing predators while being eaten by  
752 parasites elicits additive reductions in tadpole activity that give rise to strong non-  
753 lethal effects from reduced feeding. These studies underscore how different consumer  
754 states can have different non-lethal effects, and highlight how non-lethal effects of  
755 predation and parasitism can interact.

756
